# Supplementary material for: Evaluation of Birth by Cesarean Delivery and Development of Early-Onset Colorectal Cancer
Source: PubMed Central journal article supplement (PMC10140807; doi:10.1001/jamanetworkopen.2023.10316), 2023-04-27
Supplement: jamanetwopen-e2310316-s002.pdf [file jamanetwopen-e2310316-s002.pdf]

## Data Sharing Statement

Cao. Evaluation of Birth by Cesarean Delivery and Development of Early-Onset Colorectal Cancer. *JAMA Netw Open*. Published April 27, 2023.  
doi:10.1001/jamanetworkopen.2023.10316

### Data

**Data available:** No
